# Supplementary material for: Pre-flight exercise and bone metabolism predict unloading-induced bone loss due to spaceflight
Source: PubMed Central journal article supplement — Br J Sports Med. 2021 Feb 17;56(4):196–203. doi: 10.1136/bjsports-2020-103602 (PMC8862023; doi:10.1136/bjsports-2020-103602), 2021-02-17
Supplement: bjsports-2020-103602supp003.pdf [file bjsports-2020-103602supp003.pdf]

## Supplementary Tables

Supplementary Table 1. Bone densitometry data before and after spaceflight.

|                                  | <i>N</i> | <b>Pre-flight</b>    | <b>Post-flight</b>     |
|----------------------------------|----------|----------------------|------------------------|
| <i>Bone Densitometry</i>         |          |                      |                        |
| LS aBMD                          | 17       | 1.072 (1.017, 1.143) | 1.064 (0.971, 1.119)** |
| FN aBMD – Dom                    | 15       | 0.839 (0.801, 0.929) | 0.809 (0.749, 0.907)** |
| FN aBMD – ND                     | 16       | 0.841 (0.798, 0.910) | 0.806 (0.759, 0.901)** |
| TH aBMD – Dom                    | 16       | 1.025 (0.974, 1.12)  | 0.986 (0.890, 1.071)** |
| TH aBMD – ND                     | 17       | 1.009 (0.982, 1.095) | 0.985 (0.908, 1.035)** |
| <i>Body mass and composition</i> |          |                      |                        |
| Total mass (g)                   | 17       | 79664 (75414, 86955) | 78753 (74456, 89277)   |
| Total lean mass (g) <sup>a</sup> | 17       | 56544 (50907, 62329) | 57385 (51606, 62795)   |
| Total lean (%) <sup>a</sup>      | 17       | 70.3 (69.1, 73.3)    | 72.0 (70.3, 74.0)      |
| Total fat mass (g)               | 17       | 20106 (17442, 24527) | 19861 (17393, 23410)   |
| Total fat (%)                    | 17       | 25.9 (23.6, 27.5)    | 24.4 (22.7, 26.4)      |

Data are median (interquartile range). <sup>a</sup>total lean mass less bone mineral content

\*\* $p < 0.01$  for difference post- vs. pre-flight based on Wilcoxon signed rank test. Pairwise percent change data presented in text.

LS, lumbar spine; FN, femoral neck; TH, total hip; aBMD, areal bone mineral density; Dom, dominant limb; ND, non-dominant limb.

Supplementary Table 2. Relationship between pre-flight biochemical markers and change in HR-pQCT bone variables.

|                           | Tt.vBMD                           |                                   | F.Load                              |                                     | Ct.vBMD                           |                                   | Tb.vBMD                           |                           |
|---------------------------|-----------------------------------|-----------------------------------|-------------------------------------|-------------------------------------|-----------------------------------|-----------------------------------|-----------------------------------|---------------------------|
|                           | Dom                               | ND                                | Dom                                 | ND                                  | Dom                               | ND                                | Dom                               | ND                        |
| <i>Tibia<sup>a</sup></i>  |                                   |                                   |                                     |                                     |                                   |                                   |                                   |                           |
| CTx (ug/d)                | <b>-0.006</b><br>(-0.009, -0.002) | <b>-0.005</b><br>(-0.008, -0.001) | <b>-0.231</b><br>(-0.404, -0.057)   | -0.248<br>(-0.521, 0.025)           | <b>-0.017</b><br>(-0.031, -0.002) | <b>-0.021</b><br>(-0.040, -0.002) | -0.002<br>(-0.006, 0.002)         | 0.000<br>(-0.004, 0.003)  |
| CTx (ug/mmol Cr)          | <b>-0.132</b><br>(-0.203, -0.060) | <b>-0.123</b><br>(-0.182, -0.064) | <b>-4.857</b><br>(-8.529, -1.184)   | <b>-6.169</b><br>(-10.472, -1.865)  | -0.248<br>(-0.555, 0.059)         | -0.303<br>(-0.708, 0.101)         | -0.051<br>(-0.141, 0.04)          | -0.027<br>(-0.097, 0.043) |
| NTx (nmol/d)              | -0.012<br>(-0.034, 0.010)         | -0.011<br>(-0.034, 0.011)         | -0.664<br>(-1.549, 0.221)           | -0.385<br>(-1.510, 0.740)           | -0.035<br>(-0.102, 0.032)         | -0.037<br>(-0.119, 0.045)         | -0.004<br>(-0.024, 0.017)         | 0.002<br>(-0.017, 0.020)  |
| NTx (nmol/mmol Cr)        | -0.479<br>(-0.964, 0.005)         | -0.432<br>(-0.923, 0.059)         | <b>-22.72</b><br>(-42.492, -2.948)  | -18.553<br>(-42.702, 5.597)         | -0.349<br>(-2.057, 1.358)         | -0.462<br>(-2.493, 1.568)         | -0.101<br>(-0.545, 0.342)         | -0.053<br>(-0.507, 0.400) |
| OC (ng/mL)                | <b>-0.735</b><br>(-1.437, -0.033) | -0.525<br>(-1.229, 0.179)         | -22.595<br>(-56.556, 11.365)        | -21.712<br>(-55.959, 12.534)        | -0.511<br>(-3.075, 2.053)         | -0.268<br>(-3.262, 2.726)         | -0.588<br>(-1.2, 0.024)           | -0.294<br>(-0.941, 0.354) |
| P1NP (ug/L)               | <b>-0.354</b><br>(-0.588, -0.12)  | <b>-0.335</b><br>(-0.529, -0.140) | <b>-13.624</b><br>(-23.415, -3.833) | <b>-16.912</b><br>(-29.579, -4.245) | -0.281<br>(-1.259, 0.697)         | -0.495<br>(-1.715, 0.726)         | <b>-0.263</b><br>(-0.468, -0.057) | -0.130<br>(-0.323, 0.062) |
| Sclerostin (pmol/L)       | <b>0.434</b><br>(0.046, 0.822)    | 0.289<br>(-0.105, 0.684)          | <b>18.600</b><br>(3.507, 33.693)    | 2.39<br>(-22.765, 27.544)           | 0.549<br>(-0.871, 1.969)          | -0.066<br>(-1.939, 1.807)         | 0.247<br>(-0.125, 0.618)          | -0.004<br>(-0.299, 0.292) |
| <i>Radius<sup>b</sup></i> |                                   |                                   |                                     |                                     |                                   |                                   |                                   |                           |
| CTx (ug/d)                | -0.001<br>(-0.004, 0.001)         | -0.002<br>(-0.007, 0.004)         | 0.060<br>(-0.113, 0.233)            | -0.071<br>(-0.365, 0.222)           | 0.001<br>(-0.007, 0.009)          | -0.002<br>(-0.015, 0.011)         | 0.000<br>(-0.002, 0.002)          | -0.001<br>(-0.004, 0.002) |
| CTx (ug/mmol Cr)          | -0.022<br>(-0.054, 0.01)          | -0.021<br>(-0.099, 0.057)         | 0.601<br>(-1.668, 2.869)            | 0.061<br>(-4.079, 4.201)            | -0.006<br>(-0.115, 0.104)         | 0.000<br>(-0.180, 0.181)          | -0.007<br>(-0.034, 0.020)         | -0.020<br>(-0.055, 0.016) |
| NTx (nmol/d)              | 0.003<br>(-0.007, 0.013)          | 0.005<br>(-0.014, 0.024)          | 0.504<br>(-0.057, 1.065)            | -0.171<br>(-1.293, 0.95)            | 0.024<br>(-0.013, 0.061)          | 0.001<br>(-0.062, 0.064)          | 0.002<br>(-0.013, 0.018)          | 0.002<br>(-0.011, 0.016)  |
| NTx (nmol/mmol Cr)        | -0.016<br>(-0.191, 0.159)         | -0.005<br>(-0.319, 0.308)         | 7.968<br>(-2.430, 18.365)           | 3.754<br>(-15.115, 22.623)          | 0.149<br>(-0.476, 0.774)          | 0.310<br>(-0.623, 1.243)          | -0.082<br>(-0.332, 0.169)         | -0.010<br>(-0.195, 0.174) |
| OC (ng/mL)                | -0.140<br>(-0.334, 0.054)         | 0.036<br>(-0.36, 0.432)           | 3.082<br>(-10.505, 16.67)           | 11.649<br>(-10.678, 33.975)         | -0.455<br>(-1.29, 0.381)          | 0.681<br>(-0.652, 2.014)          | -0.170<br>(-0.498, 0.158)         | 0.013<br>(-0.325, 0.350)  |
| P1NP (ug/L)               | -0.066<br>(-0.158, 0.026)         | 0.016<br>(-0.209, 0.241)          | 1.119<br>(-5.883, 8.122)            | 4.53<br>(-5.737, 14.797)            | 0.065<br>(-0.283, 0.413)          | 0.128<br>(-0.374, 0.630)          | -0.034<br>(-0.096, 0.028)         | -0.067<br>(-0.212, 0.078) |
| Sclerostin (pmol/L)       | 0.042<br>(-0.097, 0.182)          | -0.020<br>(-0.334, 0.294)         | 0.113<br>(-9.573, 9.799)            | -11.291<br>(-17.612, 14.281)        | -0.078<br>(-0.596, 0.441)         | 0.43<br>(-0.468, 1.328)           | 0.036<br>(-0.088, 0.159)          | 0.133<br>(-0.068, 0.334)  |

Data are coefficients (95% confidence interval) of the biomarker by time interaction, representing the change in bone variables per unit increase in biochemical marker. Mixed effects models included time (pre-, post-flight), mission duration, interaction between mission duration and time, biomarker and interaction between biomarker and time. Pre-flight biomarkers are mean of L-180 and L-45. **Bolded** values indicate a significant ( $p < 0.05$ ) interaction with time in mixed effects model. CTx, type I collagen C-terminal cross-linked telopeptide; NTx, type I collagen N-terminal cross-linked telopeptide; OC, osteocalcin; P1NP, procollagen type I amino-terminal propeptide; Cr, creatinine.

Supplementary Table 3. Relationship between exercise and pre- to post-flight change in HR-pQCT trabecular bone variables

| Tibia                                  | Tb.vBMD (mg/cm <sup>3</sup> ) |                             | Tb.BV/TV (%)                |                            | Tb.Th (µm)                  |                                |
|----------------------------------------|-------------------------------|-----------------------------|-----------------------------|----------------------------|-----------------------------|--------------------------------|
|                                        | Dom                           | ND                          | Dom                         | ND                         | Dom                         | ND                             |
| Pre-flight Run volume (hrs/wk)         | <b>5.3 (-8.4, -2.2)</b>       | <b>-4.1 (-7.5, -0.7)</b>    | <b>-0.65 (-1.03, -0.27)</b> | <b>-0.42 (-0.84, 0.00)</b> | <b>-4.71 (-7.91, -1.51)</b> | <b>-4.88 (-8.67, -1.09)</b>    |
| Change in Run volume (hrs/wk)          | 5.0 (-0.9, 11.0)              | 4.0 (-0.5, 8.6)             | 0.62 (-0.11, 1.36)          | 0.44 (-0.10, 0.98)         | 4.69 (-0.43, 9.80)          | 3.98 (-1.30, 9.25)             |
| Pre-flight heel raise volume (reps/wk) | -0.023 (-0.092, 0.046)        | -0.044 (-0.101, 0.014)      | -0.004 (-0.012, 0.005)      | -0.003 (-0.010, 0.004)     | 0.044 (-0.092, 0.003)       | <b>-0.067 (-0.117, -0.018)</b> |
| Change in heel raise volume (reps/wk)  | 0.011 (-0.020, 0.043)         | <b>0.027 (0.001, 0.052)</b> | 0.002 (-0.002, 0.006)       | 0.003 (-0.001, 0.006)      | 0.013 (-0.015, 0.041)       | <b>0.030 (0.007, 0.058)</b>    |
| Change in deadlift volume (reps/wk)    | 0.022 (-0.009, 0.053)         | <b>0.029 (0.004, 0.055)</b> | 0.003 (-0.001, 0.007)       | 0.003 (-0.001, 0.006)      | 0.020 (-0.006, 0.045)       | <b>0.034 (0.008, 0.059)</b>    |
| In-flight deadlift volume (reps/wk)    | 0.023 (-0.005, 0.052)         | <b>0.029 (0.005, 0.053)</b> | 0.003 (-0.001, 0.006)       | 0.003 (-0.000, 0.006)      | 0.013 (-0.016, 0.042)       | <b>0.030 (0.001, 0.059)</b>    |

Data are coefficients (95% confidence interval) of the exercise by time interaction, representing the change in bone variables per unit increase in exercise. Mixed effects models included time (pre-, post-flight), mission duration, interaction between mission duration and time, exercise and interaction between exercise and time. Tb.vBMD, trabecular volumetric bone mineral density; Tb.BV/TV, trabecular bone volume fraction; Tb.Th, trabecular thickness; Dom, dominant limb; ND, non-dominant limb. Note: A change of 4 mg/cm<sup>3</sup>, 0.5% and 5 µm for Tb.vBMD, Tb.BV/TV and Tb.Th, respectively, is equivalent to a relative change of approximately 2%. **Bolded** values indicate a significant ( $p < 0.05$ ) interaction between exercise and time in mixed effects model.
